# Supplementary material for: Fabrication of porous and visible light active ZnO nanorods and ZnO@TiO2core–shell photocatalysts for self-cleaning applications
Source: Royal Society of Chemistry journal article supplement (doi:10.1039/d3cp01996a), 2023-01-01
Supplement: d3cp01996a1.pdf [file d3cp01996a1.pdf]

## Supplementary Information

### **Fabrication of Porous and Visible Light Active ZnO Nanorods and ZnO@TiO<sub>2</sub> Core-Shell Photocatalysts for Self-Cleaning Applications**

Ajay Kumar<sup>a</sup>, Dipali Nayak<sup>b</sup>, Pooja Sahoo<sup>b</sup>, Barun Kumar Nandi<sup>a</sup>, V.K. Saxena<sup>a</sup>, R.Thangavel<sup>b\*</sup>

<sup>a</sup>Department of Fuel, Minerals and Metallurgical Engineering, Indian Institute of Technology  
(Indian School of Mines) Dhanbad, 826004, Jharkhand, India

<sup>b</sup>Department of Physics, Indian Institute of Technology (Indian School of Mines) Dhanbad,  
826004, Jharkhand, India

[\\*rthangavel@iitism.ac.in](mailto:rthangavel@iitism.ac.in)

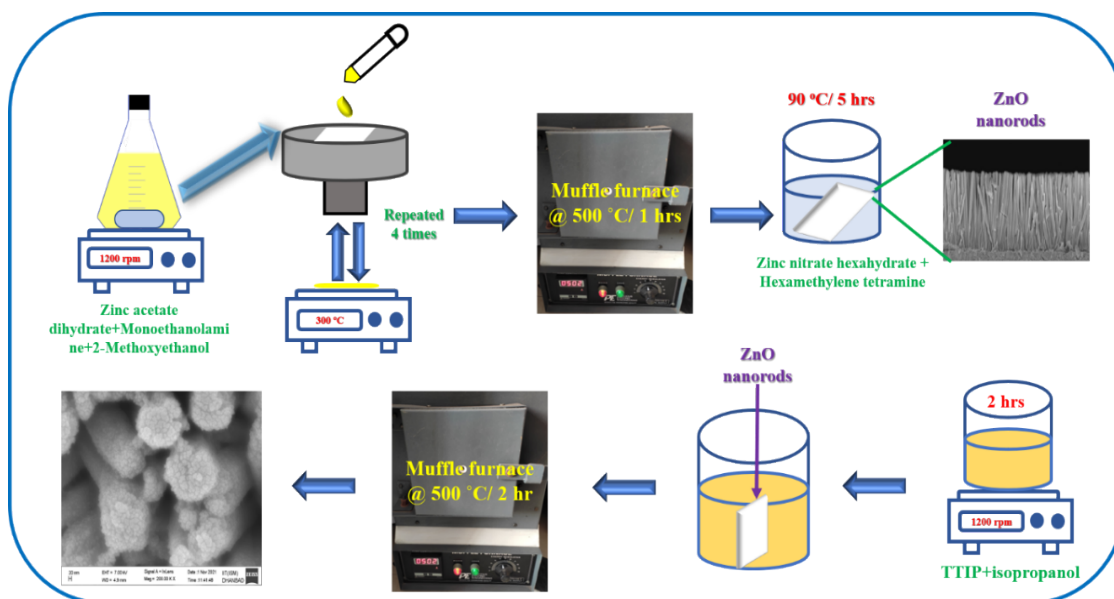

**Fig. S1** Schematic representation of ZnO NRs and ZnO@TiO<sub>2</sub> core-shell.

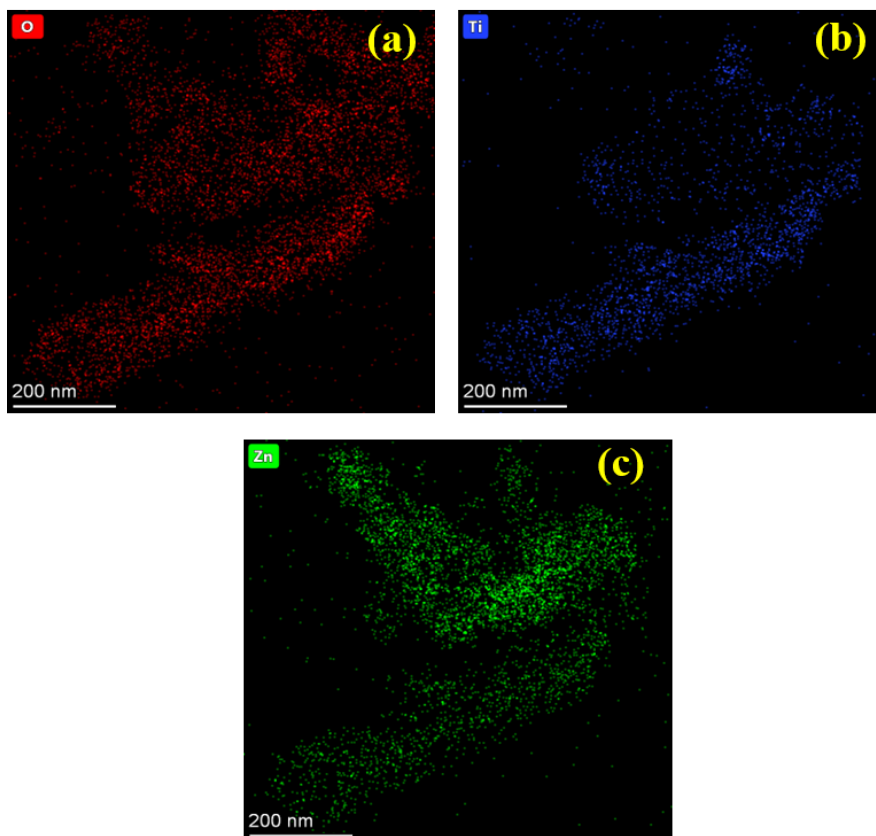

**Fig. S2** HAADF-STEM and EDX elemental mapping images of O, Ti and Zn of the ZnO@TiO<sub>2</sub>: 2 cycle core-shell

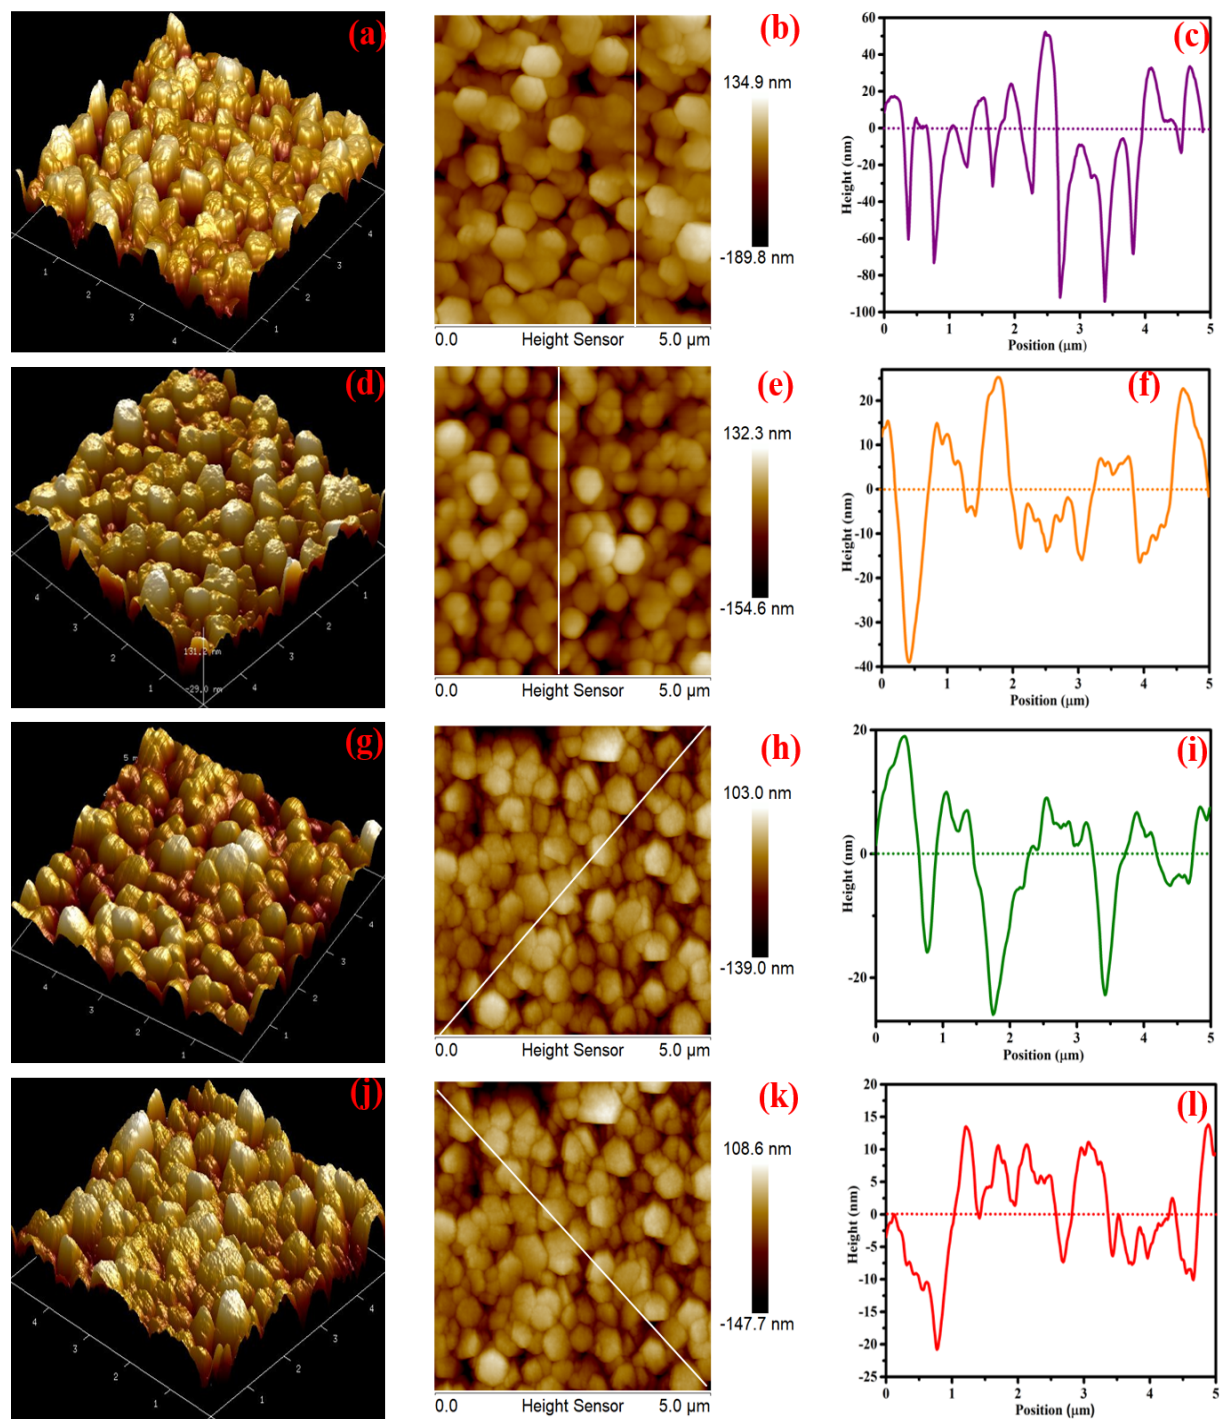

**Fig. S3** 2D, 3D and section profile AFM image of (a-c) ZnO NRs, (d-f) ZnO@TiO<sub>2</sub>: 1 cycle, (g-i) ZnO@TiO<sub>2</sub>: 2 cycle and (j-l) ZnO@TiO<sub>2</sub>: 3 cycle.

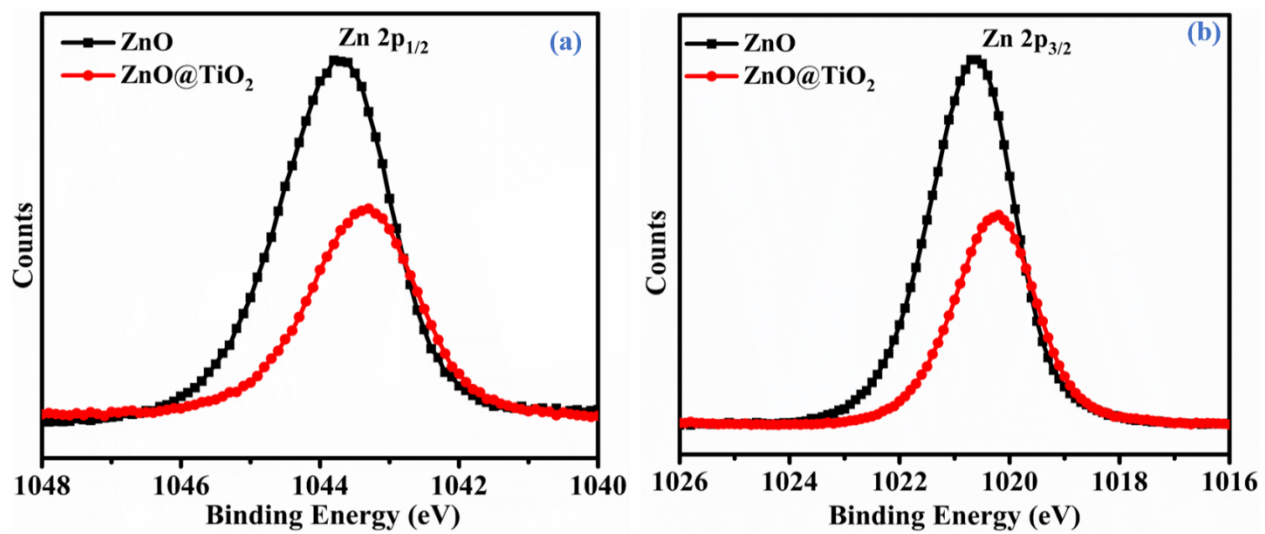

**Fig. S4** Comparative peak shift of Zn (a) 2p<sub>1/2</sub> and (b) 2p<sub>3/2</sub> states of ZnO NRs and ZnO@TiO<sub>2</sub>:2 cycle CS.

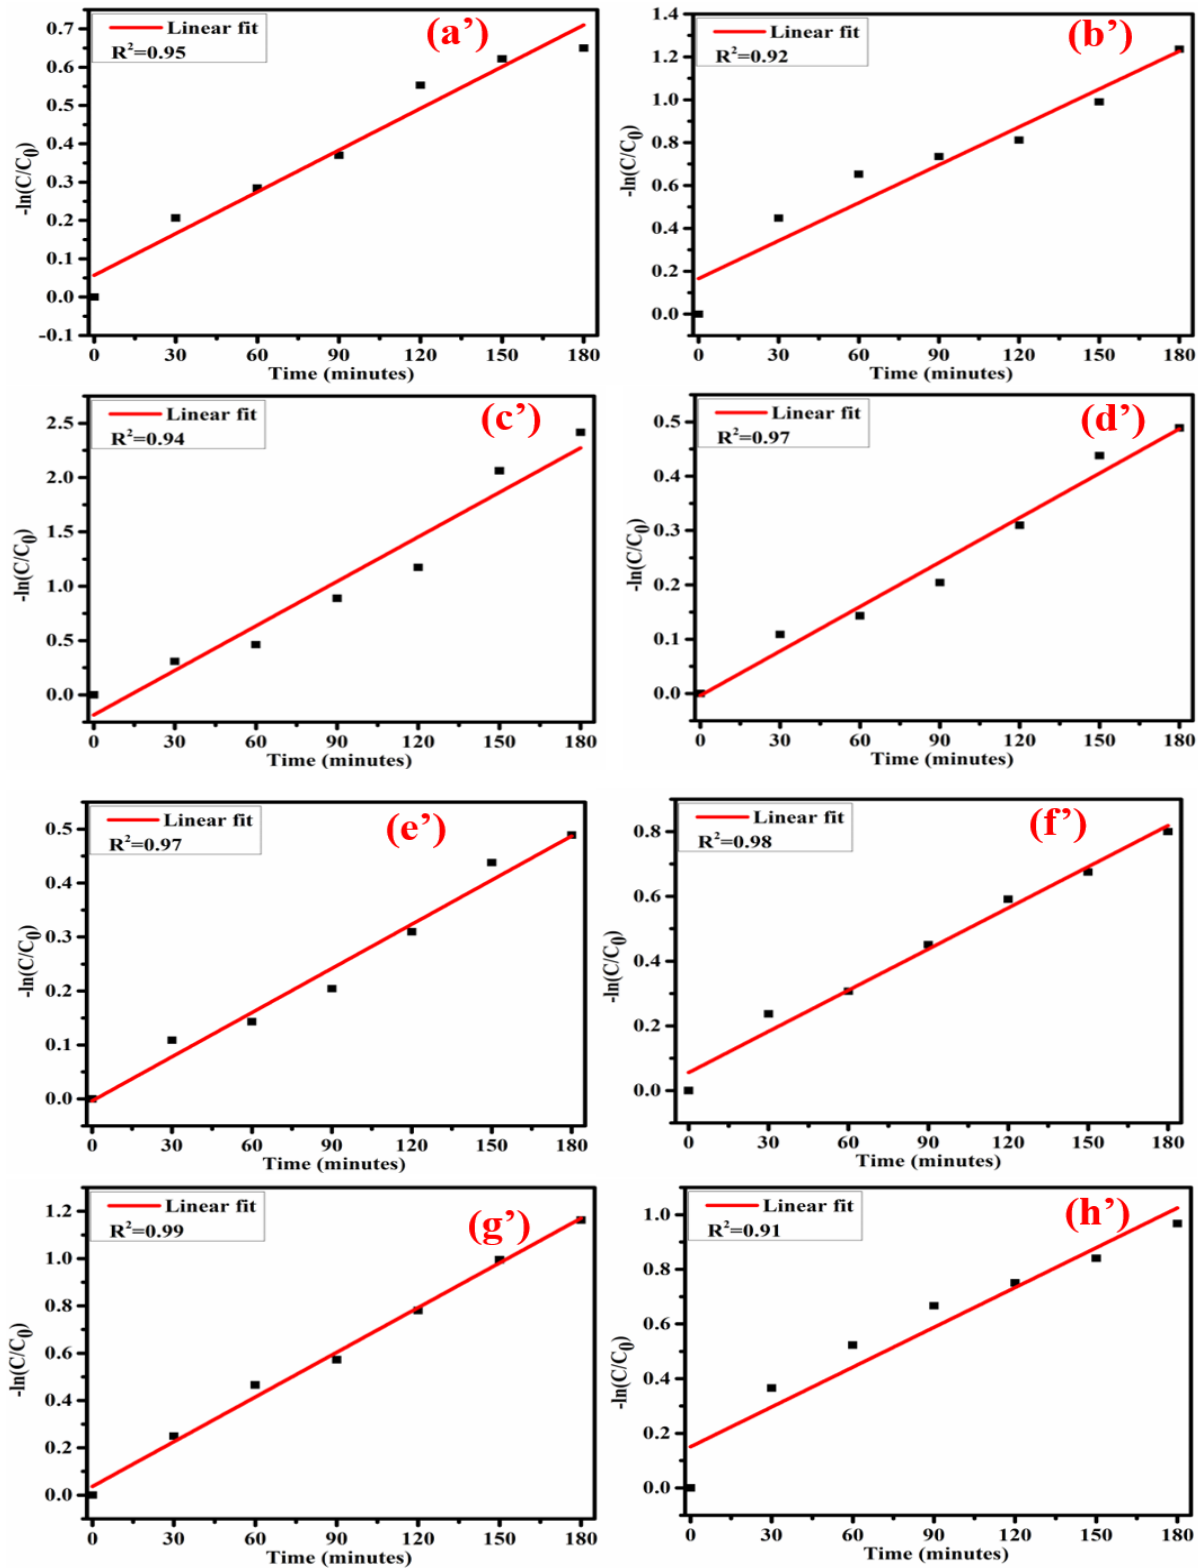

**Fig. S5** a', b', c' d' is the respective kinetic study of a, b, c and d under UV light irradiation and e', f', g' h' is the respective kinetic study of e, f, g and h under sunlight irradiation.

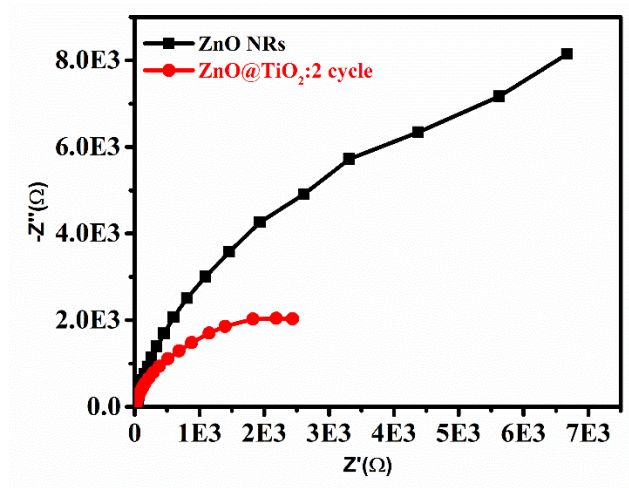

**Fig. S6** Nyquist plot of the pristine ZnO NRs and ZnO@TiO<sub>2</sub>: 2 cycle sample.
